# Supplementary material for: Tetraquinolines; four linked quinoline units or porphyrinoids
Source: Royal Society of Chemistry journal article supplement (doi:10.1039/d3ob01616a), 2024-01-01
Supplement: d3ob01616a1.pdf [file d3ob01616a1.pdf]

Electronic Supplementary Information

## Tetraquinolines; Four Linked Quinoline Units or Porphyrinoids

Zahra Badri<sup>1</sup>, Farnoush Nouri<sup>2</sup>, Cina Foroutan-Nejad<sup>1\*</sup>

1. *Institute of Organic Chemistry, Polish Academy of Sciences, Kasprzaka 44/52, 01-224  
Warsaw, Poland.*
2. *Department of Chemistry, University at Buffalo, State University of New York, Buffalo, NY  
14260, USA.*

Corresponding Author's email: [cina.foroutan-nejad@icho.edu.pl](mailto:cina.foroutan-nejad@icho.edu.pl)

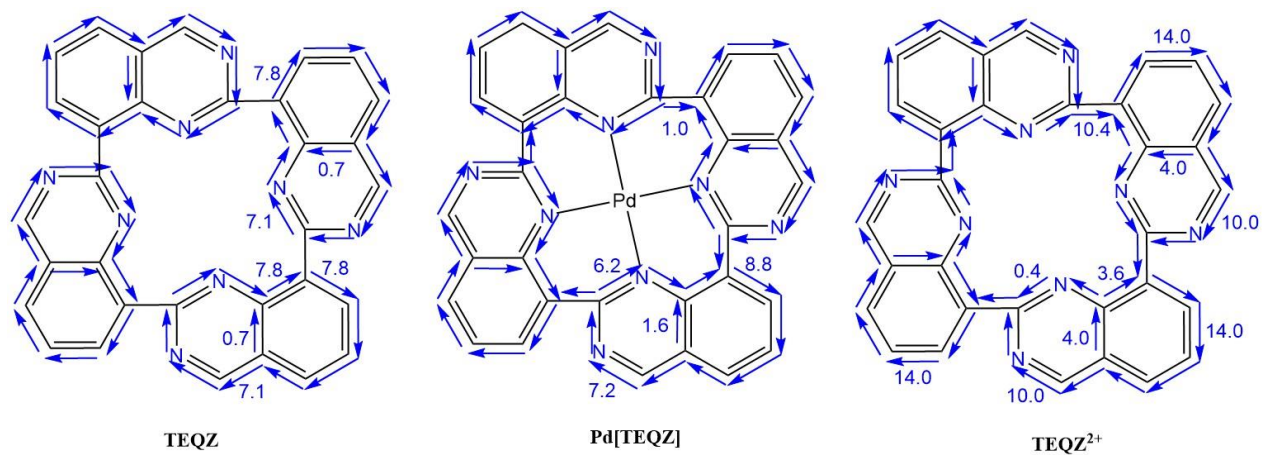

Fig. S1. Current density in nA/T for TEQZ derivatives.

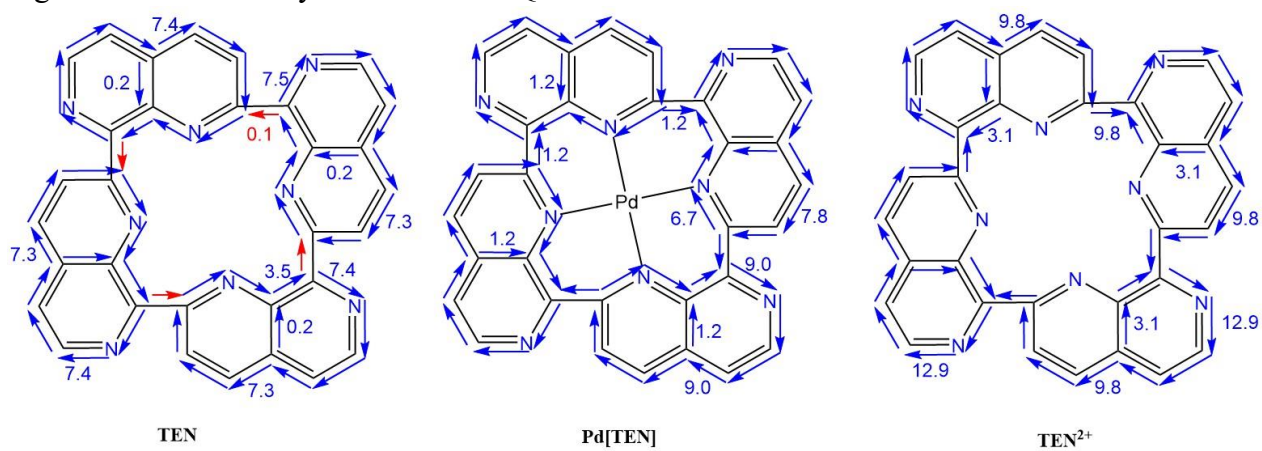

Fig. S2. Current density in nA/T for TEN derivatives.

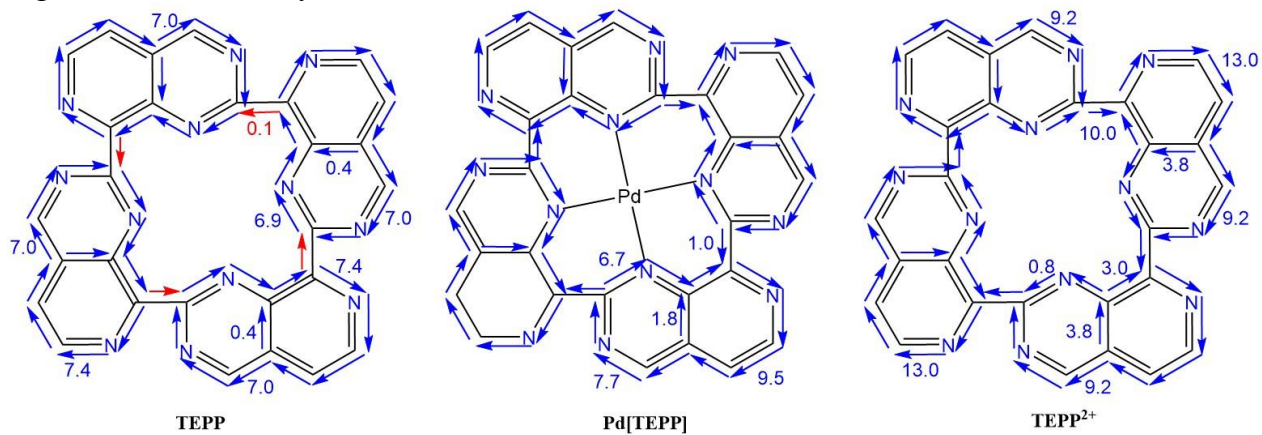

Fig. S3. Current density in nA/T for TEPP derivatives.

Table S1. AV1245 values for the selected systems.

| Molecule | Pathway   | AV1245 | Molecule          | Pathway   | AV1245 |
|----------|-----------|--------|-------------------|-----------|--------|
| Zn[Por]  | Outer rim | 2.547  | TEQ <sup>2+</sup> | Outer rim | 2.270  |
|          | Inner rim | 1.778  |                   | Inner rim | -0.124 |
| Ni[Nor]  | Outer rim | 3.301  | Pd[TEQ]           | Qn        | 3.599  |
|          | Inner rim | 1.105  |                   | Outer rim | 2.330  |
| TEQ      | Outer rim | 2.198  |                   | Inner rim | -0.128 |
|          | Inner rim | -0.607 |                   | Qn        | 4.394  |
|          | Qn        | 5.657  |                   |           |        |

## Cartesian Coordinates of Optimized Systems

TEQ

E(RB3LYP) = -1603.66695412

```

6   -3.122506000   2.571877000   1.913419000
6   -2.218785000   2.154842000   0.966165000
6   -0.869492000   2.600675000   1.041934000
6   -0.479034000   3.441349000   2.124324000
6   -1.435289000   3.828775000   3.089661000
6   -2.733596000   3.407507000   2.980661000
1   -4.148458000   2.233655000   1.850246000
6    0.869492000   3.857848000   2.163473000
1   -1.126136000   4.464785000   3.909493000
1   -3.467748000   3.705912000   3.716618000
6    1.728078000   3.457677000   1.178866000
6    1.240505000   2.635825000   0.131635000
1    2.768075000   3.751137000   1.184545000
6    2.154842000   2.218785000  -0.966165000
6    2.600675000   0.869492000  -1.041934000
6    2.571877000   3.122506000  -1.913419000
6    3.441349000   0.479034000  -2.124324000
6    3.407507000   2.733596000  -2.980661000
1    2.233655000   4.148458000  -1.850246000
6    2.635825000  -1.240505000  -0.131635000
6    3.857848000  -0.869492000  -2.163473000
6    3.828775000   1.435289000  -3.089661000
1    3.705912000   3.467748000  -3.716618000
6    3.457677000  -1.728078000  -1.178866000
1    4.490262000  -1.207178000  -2.975039000
1    4.464785000   1.126136000  -3.909493000
1    3.751137000  -2.768075000  -1.184545000
6    2.218785000  -2.154842000   0.966165000
6    0.869492000  -2.600675000   1.041934000
6    3.122506000  -2.571877000   1.913419000

```

|   |              |              |              |
|---|--------------|--------------|--------------|
| 6 | 0.479034000  | -3.441349000 | 2.124324000  |
| 6 | 2.733596000  | -3.407507000 | 2.980661000  |
| 1 | 4.148458000  | -2.233655000 | 1.850246000  |
| 6 | -1.240505000 | -2.635825000 | 0.131635000  |
| 6 | 1.435289000  | -3.828775000 | 3.089661000  |
| 1 | 3.467748000  | -3.705912000 | 3.716618000  |
| 1 | 1.126136000  | -4.464785000 | 3.909493000  |
| 6 | -2.154842000 | -2.218785000 | -0.966165000 |
| 6 | -2.600675000 | -0.869492000 | -1.041934000 |
| 6 | -2.571877000 | -3.122506000 | -1.913419000 |
| 6 | -3.441349000 | -0.479034000 | -2.124324000 |
| 6 | -3.407507000 | -2.733596000 | -2.980661000 |
| 1 | -2.233655000 | -4.148458000 | -1.850246000 |
| 6 | -2.635825000 | 1.240505000  | -0.131635000 |
| 6 | -3.857848000 | 0.869492000  | -2.163473000 |
| 6 | -3.828775000 | -1.435289000 | -3.089661000 |
| 1 | -3.705912000 | -3.467748000 | -3.716618000 |
| 6 | -3.457677000 | 1.728078000  | -1.178866000 |
| 1 | -4.490262000 | 1.207178000  | -2.975039000 |
| 1 | -4.464785000 | -1.126136000 | -3.909493000 |
| 1 | -3.751137000 | 2.768075000  | -1.184545000 |
| 7 | -0.005541000 | 2.230672000  | 0.065302000  |
| 7 | 2.230672000  | 0.005541000  | -0.065302000 |
| 7 | 0.005541000  | -2.230672000 | 0.065302000  |
| 7 | -2.230672000 | -0.005541000 | -0.065302000 |
| 6 | -0.869492000 | -3.857848000 | 2.163473000  |
| 6 | -1.728078000 | -3.457677000 | 1.178866000  |
| 1 | -2.768075000 | -3.751137000 | 1.184545000  |
| 1 | -1.207178000 | -4.490262000 | 2.975039000  |
| 1 | 1.207178000  | 4.490262000  | 2.975039000  |

Pd[TEQ]

E(RB3LYP) = -1731.25701472

|   |              |              |             |
|---|--------------|--------------|-------------|
| 6 | -2.982899000 | -2.593252000 | 2.182990000 |
| 6 | -2.340562000 | -1.852750000 | 1.205915000 |
| 6 | -2.705759000 | -0.496079000 | 1.025969000 |
| 6 | -3.844492000 | 0.000000000  | 1.716802000 |
| 6 | -4.454379000 | -0.781969000 | 2.720810000 |
| 6 | -3.997816000 | -2.047324000 | 2.981464000 |
| 1 | -2.705004000 | -3.628241000 | 2.325413000 |
| 6 | -4.357361000 | 1.251810000  | 1.322278000 |
| 1 | -5.297557000 | -0.373197000 | 3.260349000 |
| 1 | -4.451294000 | -2.648388000 | 3.755860000 |

|   |              |              |              |
|---|--------------|--------------|--------------|
| 6 | -3.760508000 | 1.939610000  | 0.306097000  |
| 6 | -2.549370000 | 1.465745000  | -0.247074000 |
| 1 | -4.149756000 | 2.889338000  | -0.023228000 |
| 6 | -1.852750000 | 2.340562000  | -1.205915000 |
| 6 | -0.496079000 | 2.705759000  | -1.025969000 |
| 6 | -2.593252000 | 2.982899000  | -2.182990000 |
| 6 | 0.000000000  | 3.844492000  | -1.716802000 |
| 6 | -2.047324000 | 3.997816000  | -2.981464000 |
| 1 | -3.628241000 | 2.705004000  | -2.325413000 |
| 6 | 1.465745000  | 2.549370000  | 0.247074000  |
| 6 | 1.251810000  | 4.357361000  | -1.322278000 |
| 6 | -0.781969000 | 4.454379000  | -2.720810000 |
| 1 | -2.648388000 | 4.451294000  | -3.755860000 |
| 6 | 1.939610000  | 3.760508000  | -0.306097000 |
| 1 | 1.649797000  | 5.231931000  | -1.819056000 |
| 1 | -0.373197000 | 5.297557000  | -3.260349000 |
| 1 | 2.889338000  | 4.149756000  | 0.023228000  |
| 6 | 2.340562000  | 1.852750000  | 1.205915000  |
| 6 | 2.705759000  | 0.496079000  | 1.025969000  |
| 6 | 2.982899000  | 2.593252000  | 2.182990000  |
| 6 | 3.844492000  | 0.000000000  | 1.716802000  |
| 6 | 3.997816000  | 2.047324000  | 2.981464000  |
| 1 | 2.705004000  | 3.628241000  | 2.325413000  |
| 6 | 2.549370000  | -1.465745000 | -0.247074000 |
| 6 | 4.454379000  | 0.781969000  | 2.720810000  |
| 1 | 4.451294000  | 2.648388000  | 3.755860000  |
| 1 | 5.297557000  | 0.373197000  | 3.260349000  |
| 6 | 1.852750000  | -2.340562000 | -1.205915000 |
| 6 | 0.496079000  | -2.705759000 | -1.025969000 |
| 6 | 2.593252000  | -2.982899000 | -2.182990000 |
| 6 | 0.000000000  | -3.844492000 | -1.716802000 |
| 6 | 2.047324000  | -3.997816000 | -2.981464000 |
| 1 | 3.628241000  | -2.705004000 | -2.325413000 |
| 6 | -1.465745000 | -2.549370000 | 0.247074000  |
| 6 | -1.251810000 | -4.357361000 | -1.322278000 |
| 6 | 0.781969000  | -4.454379000 | -2.720810000 |
| 1 | 2.648388000  | -4.451294000 | -3.755860000 |
| 6 | -1.939610000 | -3.760508000 | -0.306097000 |
| 1 | -1.649797000 | -5.231931000 | -1.819056000 |
| 1 | 0.373197000  | -5.297557000 | -3.260349000 |
| 1 | -2.889338000 | -4.149756000 | 0.023228000  |
| 7 | -2.022699000 | 0.308661000  | 0.146084000  |
| 7 | 0.308661000  | 2.022699000  | -0.146084000 |

|    |              |              |              |
|----|--------------|--------------|--------------|
| 7  | 2.022699000  | -0.308661000 | 0.146084000  |
| 7  | -0.308661000 | -2.022699000 | -0.146084000 |
| 6  | 4.357361000  | -1.251810000 | 1.322278000  |
| 6  | 3.760508000  | -1.939610000 | 0.306097000  |
| 1  | 4.149756000  | -2.889338000 | -0.023228000 |
| 1  | 5.231931000  | -1.649797000 | 1.819056000  |
| 1  | -5.231931000 | 1.649797000  | 1.819056000  |
| 46 | 0.000000000  | 0.000000000  | 0.000000000  |

TEQ<sup>2+</sup>

E(RB3LYP) = -1603.04066291

|   |              |              |              |
|---|--------------|--------------|--------------|
| 6 | -3.286323000 | 2.780424000  | 1.594639000  |
| 6 | -2.291638000 | 2.196148000  | 0.821463000  |
| 6 | -0.923267000 | 2.590765000  | 1.018278000  |
| 6 | -0.626457000 | 3.552716000  | 2.035511000  |
| 6 | -1.653818000 | 4.044975000  | 2.848180000  |
| 6 | -2.970164000 | 3.658550000  | 2.630101000  |
| 1 | -4.318373000 | 2.507276000  | 1.426165000  |
| 6 | 0.693842000  | 4.054488000  | 2.093729000  |
| 1 | -1.421481000 | 4.767507000  | 3.619078000  |
| 1 | -3.757281000 | 4.049172000  | 3.259195000  |
| 6 | 1.601047000  | 3.658550000  | 1.152864000  |
| 6 | 1.225809000  | 2.675385000  | 0.205466000  |
| 1 | 2.608235000  | 4.046863000  | 1.152554000  |
| 6 | 2.196148000  | 2.291638000  | -0.821463000 |
| 6 | 2.590765000  | 0.923267000  | -1.018278000 |
| 6 | 2.780424000  | 3.286323000  | -1.594639000 |
| 6 | 3.552716000  | 0.626457000  | -2.035511000 |
| 6 | 3.658550000  | 2.970164000  | -2.630101000 |
| 1 | 2.507276000  | 4.318373000  | -1.426165000 |
| 6 | 2.675385000  | -1.225809000 | -0.205466000 |
| 6 | 4.054488000  | -0.693842000 | -2.093729000 |
| 6 | 4.044975000  | 1.653818000  | -2.848180000 |
| 1 | 4.049172000  | 3.757281000  | -3.259195000 |
| 6 | 3.658550000  | -1.601047000 | -1.152864000 |
| 1 | 4.766943000  | -0.963344000 | -2.861927000 |
| 1 | 4.767507000  | 1.421481000  | -3.619078000 |
| 1 | 4.046863000  | -2.608235000 | -1.152554000 |
| 6 | 2.291638000  | -2.196148000 | 0.821463000  |
| 6 | 0.923267000  | -2.590765000 | 1.018278000  |
| 6 | 3.286323000  | -2.780424000 | 1.594639000  |
| 6 | 0.626457000  | -3.552716000 | 2.035511000  |

|   |              |              |              |
|---|--------------|--------------|--------------|
| 6 | 2.970164000  | -3.658550000 | 2.630101000  |
| 1 | 4.318373000  | -2.507276000 | 1.426165000  |
| 6 | -1.225809000 | -2.675385000 | 0.205466000  |
| 6 | 1.653818000  | -4.044975000 | 2.848180000  |
| 1 | 3.757281000  | -4.049172000 | 3.259195000  |
| 1 | 1.421481000  | -4.767507000 | 3.619078000  |
| 6 | -2.196148000 | -2.291638000 | -0.821463000 |
| 6 | -2.590765000 | -0.923267000 | -1.018278000 |
| 6 | -2.780424000 | -3.286323000 | -1.594639000 |
| 6 | -3.552716000 | -0.626457000 | -2.035511000 |
| 6 | -3.658550000 | -2.970164000 | -2.630101000 |
| 1 | -2.507276000 | -4.318373000 | -1.426165000 |
| 6 | -2.675385000 | 1.225809000  | -0.205466000 |
| 6 | -4.054488000 | 0.693842000  | -2.093729000 |
| 6 | -4.044975000 | -1.653818000 | -2.848180000 |
| 1 | -4.049172000 | -3.757281000 | -3.259195000 |
| 6 | -3.658550000 | 1.601047000  | -1.152864000 |
| 1 | -4.766943000 | 0.963344000  | -2.861927000 |
| 1 | -4.767507000 | -1.421481000 | -3.619078000 |
| 1 | -4.046863000 | 2.608235000  | -1.152554000 |
| 7 | -0.002171000 | 2.147268000  | 0.155539000  |
| 7 | 2.147268000  | 0.002171000  | -0.155539000 |
| 7 | 0.002171000  | -2.147268000 | 0.155539000  |
| 7 | -2.147268000 | -0.002171000 | -0.155539000 |
| 6 | -0.693842000 | -4.054488000 | 2.093729000  |
| 6 | -1.601047000 | -3.658550000 | 1.152864000  |
| 1 | -2.608235000 | -4.046863000 | 1.152554000  |
| 1 | -0.963344000 | -4.766943000 | 2.861927000  |
| 1 | 0.963344000  | 4.766943000  | 2.861927000  |

TEQZ

E(RB3LYP) = -1667.83900688

|   |              |             |             |
|---|--------------|-------------|-------------|
| 6 | -3.159315000 | 2.732395000 | 1.784142000 |
| 6 | -2.248902000 | 2.209299000 | 0.896862000 |
| 6 | -0.898080000 | 2.642552000 | 0.961596000 |
| 6 | -0.525261000 | 3.582263000 | 1.959741000 |
| 6 | -1.477871000 | 4.065846000 | 2.880416000 |
| 6 | -2.778681000 | 3.648045000 | 2.786488000 |
| 1 | -4.193819000 | 2.425464000 | 1.712290000 |
| 6 | 0.818012000  | 4.012961000 | 1.926191000 |
| 1 | -1.170619000 | 4.774001000 | 3.639383000 |
| 1 | -3.524235000 | 4.019075000 | 3.476039000 |

|   |              |              |              |
|---|--------------|--------------|--------------|
| 6 | 1.222823000  | 2.686383000  | 0.125597000  |
| 6 | 2.209299000  | 2.248902000  | -0.896862000 |
| 6 | 2.642552000  | 0.898080000  | -0.961596000 |
| 6 | 2.732395000  | 3.159315000  | -1.784142000 |
| 6 | 3.582263000  | 0.525261000  | -1.959741000 |
| 6 | 3.648045000  | 2.778681000  | -2.786488000 |
| 1 | 2.425464000  | 4.193819000  | -1.712290000 |
| 6 | 2.686383000  | -1.222823000 | -0.125597000 |
| 6 | 4.012961000  | -0.818012000 | -1.926191000 |
| 6 | 4.065846000  | 1.477871000  | -2.880416000 |
| 1 | 4.019075000  | 3.524235000  | -3.476039000 |
| 1 | 4.736982000  | -1.169048000 | -2.656672000 |
| 1 | 4.774001000  | 1.170619000  | -3.639383000 |
| 6 | 2.248902000  | -2.209299000 | 0.896862000  |
| 6 | 0.898080000  | -2.642552000 | 0.961596000  |
| 6 | 3.159315000  | -2.732395000 | 1.784142000  |
| 6 | 0.525261000  | -3.582263000 | 1.959741000  |
| 6 | 2.778681000  | -3.648045000 | 2.786488000  |
| 1 | 4.193819000  | -2.425464000 | 1.712290000  |
| 6 | -1.222823000 | -2.686383000 | 0.125597000  |
| 6 | 1.477871000  | -4.065846000 | 2.880416000  |
| 1 | 3.524235000  | -4.019075000 | 3.476039000  |
| 1 | 1.170619000  | -4.774001000 | 3.639383000  |
| 6 | -2.209299000 | -2.248902000 | -0.896862000 |
| 6 | -2.642552000 | -0.898080000 | -0.961596000 |
| 6 | -2.732395000 | -3.159315000 | -1.784142000 |
| 6 | -3.582263000 | -0.525261000 | -1.959741000 |
| 6 | -3.648045000 | -2.778681000 | -2.786488000 |
| 1 | -2.425464000 | -4.193819000 | -1.712290000 |
| 6 | -2.686383000 | 1.222823000  | -0.125597000 |
| 6 | -4.012961000 | 0.818012000  | -1.926191000 |
| 6 | -4.065846000 | -1.477871000 | -2.880416000 |
| 1 | -4.019075000 | -3.524235000 | -3.476039000 |
| 1 | -4.736982000 | 1.169048000  | -2.656672000 |
| 1 | -4.774001000 | -1.170619000 | -3.639383000 |
| 7 | 0.005983000  | 2.209299000  | 0.049258000  |
| 7 | 2.209299000  | -0.005983000 | -0.049258000 |
| 7 | -0.005983000 | -2.209299000 | 0.049258000  |
| 7 | -2.209299000 | 0.005983000  | -0.049258000 |
| 6 | -0.818012000 | -4.012961000 | 1.926191000  |
| 1 | -1.169048000 | -4.736982000 | 2.656672000  |
| 1 | 1.169048000  | 4.736982000  | 2.656672000  |
| 7 | 1.680149000  | 3.593363000  | 1.035006000  |



|   |              |              |              |
|---|--------------|--------------|--------------|
| 7 | 3.593363000  | -1.680149000 | -1.035006000 |
| 7 | -1.680149000 | -3.593363000 | 1.035006000  |
| 7 | -3.593363000 | 1.680149000  | -1.035006000 |

Pd[TEQZ]

E(RB3LYP) = -1795.40862433

|   |              |              |              |
|---|--------------|--------------|--------------|
| 6 | 2.734363000  | 3.049508000  | 2.064342000  |
| 6 | 2.097096000  | 2.204897000  | 1.164968000  |
| 6 | 2.657747000  | 0.934959000  | 0.915971000  |
| 6 | 3.941891000  | 0.651290000  | 1.448419000  |
| 6 | 4.541614000  | 1.515563000  | 2.384244000  |
| 6 | 3.912067000  | 2.685290000  | 2.727431000  |
| 1 | 2.320518000  | 4.034017000  | 2.221964000  |
| 6 | 4.609319000  | -0.462985000 | 0.903132000  |
| 1 | 5.507629000  | 1.256835000  | 2.796061000  |
| 1 | 4.352930000  | 3.360739000  | 3.445590000  |
| 6 | 2.772694000  | -1.028952000 | -0.327976000 |
| 6 | 2.204897000  | -2.097096000 | -1.164968000 |
| 6 | 0.934959000  | -2.657747000 | -0.915971000 |
| 6 | 3.049508000  | -2.734363000 | -2.064342000 |
| 6 | 0.651290000  | -3.941891000 | -1.448419000 |
| 6 | 2.685290000  | -3.912067000 | -2.727431000 |
| 1 | 4.034017000  | -2.320518000 | -2.221964000 |
| 6 | -1.028952000 | -2.772694000 | 0.327976000  |
| 6 | -0.462985000 | -4.609319000 | -0.903132000 |
| 6 | 1.515563000  | -4.541614000 | -2.384244000 |
| 1 | 3.360739000  | -4.352930000 | -3.445590000 |
| 1 | -0.692291000 | -5.625593000 | -1.206004000 |
| 1 | 1.256835000  | -5.507629000 | -2.796061000 |
| 6 | -2.097096000 | -2.204897000 | 1.164968000  |
| 6 | -2.657747000 | -0.934959000 | 0.915971000  |
| 6 | -2.734363000 | -3.049508000 | 2.064342000  |
| 6 | -3.941891000 | -0.651290000 | 1.448419000  |
| 6 | -3.912067000 | -2.685290000 | 2.727431000  |
| 1 | -2.320518000 | -4.034017000 | 2.221964000  |
| 6 | -2.772694000 | 1.028952000  | -0.327976000 |
| 6 | -4.541614000 | -1.515563000 | 2.384244000  |
| 1 | -4.352930000 | -3.360739000 | 3.445590000  |
| 1 | -5.507629000 | -1.256835000 | 2.796061000  |
| 6 | -2.204897000 | 2.097096000  | -1.164968000 |
| 6 | -0.934959000 | 2.657747000  | -0.915971000 |
| 6 | -3.049508000 | 2.734363000  | -2.064342000 |
| 6 | -0.651290000 | 3.941891000  | -1.448419000 |

|    |              |              |              |
|----|--------------|--------------|--------------|
| 6  | -2.685290000 | 3.912067000  | -2.727431000 |
| 1  | -4.034017000 | 2.320518000  | -2.221964000 |
| 6  | 1.028952000  | 2.772694000  | 0.327976000  |
| 6  | 0.462985000  | 4.609319000  | -0.903132000 |
| 6  | -1.515563000 | 4.541614000  | -2.384244000 |
| 1  | -3.360739000 | 4.352930000  | -3.445590000 |
| 1  | 0.692291000  | 5.625593000  | -1.206004000 |
| 1  | -1.256835000 | 5.507629000  | -2.796061000 |
| 7  | 2.049802000  | 0.000000000  | 0.107632000  |
| 7  | 0.000000000  | -2.049802000 | -0.107632000 |
| 7  | -2.049802000 | 0.000000000  | 0.107632000  |
| 7  | 0.000000000  | 2.049802000  | -0.107632000 |
| 6  | -4.609319000 | 0.462985000  | 0.903132000  |
| 1  | -5.625593000 | 0.692291000  | 1.206004000  |
| 1  | 5.625593000  | -0.692291000 | 1.206004000  |
| 7  | 4.066616000  | -1.233773000 | -0.002453000 |
| 7  | -1.233773000 | -4.066616000 | 0.002453000  |
| 7  | -4.066616000 | 1.233773000  | -0.002453000 |
| 7  | 1.233773000  | 4.066616000  | 0.002453000  |
| 46 | 0.000000000  | 0.000000000  | 0.000000000  |

TEQZ<sup>2+</sup>

E(RB3LYP) = -1667.19141101

|   |              |              |              |
|---|--------------|--------------|--------------|
| 6 | -3.468918000 | 3.002231000  | 1.023605000  |
| 6 | -2.403539000 | 2.272328000  | 0.498595000  |
| 6 | -1.060666000 | 2.657084000  | 0.852514000  |
| 6 | -0.888295000 | 3.708636000  | 1.805783000  |
| 6 | -1.990185000 | 4.329978000  | 2.393619000  |
| 6 | -3.276159000 | 3.983933000  | 1.989822000  |
| 1 | -4.469162000 | 2.760976000  | 0.696472000  |
| 6 | 0.439386000  | 4.153692000  | 2.014472000  |
| 1 | -1.837817000 | 5.109270000  | 3.128822000  |
| 1 | -4.131256000 | 4.481544000  | 2.424548000  |
| 6 | 1.169918000  | 2.729113000  | 0.401885000  |
| 6 | 2.272328000  | 2.403539000  | -0.498595000 |
| 6 | 2.657084000  | 1.060666000  | -0.852514000 |
| 6 | 3.002231000  | 3.468918000  | -1.023605000 |
| 6 | 3.708636000  | 0.888295000  | -1.805783000 |
| 6 | 3.983933000  | 3.276159000  | -1.989822000 |
| 1 | 2.760976000  | 4.469162000  | -0.696472000 |
| 6 | 2.729113000  | -1.169918000 | -0.401885000 |
| 6 | 4.153692000  | -0.439386000 | -2.014472000 |
| 6 | 4.329978000  | 1.990185000  | -2.393619000 |

|   |              |              |              |
|---|--------------|--------------|--------------|
| 1 | 4.481544000  | 4.131256000  | -2.424548000 |
| 1 | 4.921413000  | -0.649649000 | -2.752151000 |
| 1 | 5.109270000  | 1.837817000  | -3.128822000 |
| 6 | 2.403539000  | -2.272328000 | 0.498595000  |
| 6 | 1.060666000  | -2.657084000 | 0.852514000  |
| 6 | 3.468918000  | -3.002231000 | 1.023605000  |
| 6 | 0.888295000  | -3.708636000 | 1.805783000  |
| 6 | 3.276159000  | -3.983933000 | 1.989822000  |
| 1 | 4.469162000  | -2.760976000 | 0.696472000  |
| 6 | -1.169918000 | -2.729113000 | 0.401885000  |
| 6 | 1.990185000  | -4.329978000 | 2.393619000  |
| 1 | 4.131256000  | -4.481544000 | 2.424548000  |
| 1 | 1.837817000  | -5.109270000 | 3.128822000  |
| 6 | -2.272328000 | -2.403539000 | -0.498595000 |
| 6 | -2.657084000 | -1.060666000 | -0.852514000 |
| 6 | -3.002231000 | -3.468918000 | -1.023605000 |
| 6 | -3.708636000 | -0.888295000 | -1.805783000 |
| 6 | -3.983933000 | -3.276159000 | -1.989822000 |
| 1 | -2.760976000 | -4.469162000 | -0.696472000 |
| 6 | -2.729113000 | 1.169918000  | -0.401885000 |
| 6 | -4.153692000 | 0.439386000  | -2.014472000 |
| 6 | -4.329978000 | -1.990185000 | -2.393619000 |
| 1 | -4.481544000 | -4.131256000 | -2.424548000 |
| 1 | -4.921413000 | 0.649649000  | -2.752151000 |
| 1 | -5.109270000 | -1.837817000 | -3.128822000 |
| 7 | -0.015857000 | 2.149492000  | 0.190081000  |
| 7 | 2.149492000  | 0.015857000  | -0.190081000 |
| 7 | 0.015857000  | -2.149492000 | 0.190081000  |
| 7 | -2.149492000 | -0.015857000 | -0.190081000 |
| 6 | -0.439386000 | -4.153692000 | 2.014472000  |
| 1 | -0.649649000 | -4.921413000 | 2.752151000  |
| 1 | 0.649649000  | 4.921413000  | 2.752151000  |
| 7 | 1.438603000  | 3.708636000  | 1.300315000  |
| 7 | 3.708636000  | -1.438603000 | -1.300315000 |
| 7 | -1.438603000 | -3.708636000 | 1.300315000  |
| 7 | -3.708636000 | 1.438603000  | -1.300315000 |

TEN

$E(\text{RB3LYP}) = -1667.82422559$

|   |              |             |             |
|---|--------------|-------------|-------------|
| 6 | -2.265709000 | 2.198644000 | 0.883021000 |
| 6 | -0.912046000 | 2.633159000 | 0.988100000 |
| 6 | -0.598103000 | 3.553774000 | 2.022008000 |
| 6 | -1.636236000 | 3.975637000 | 2.878149000 |

|   |              |              |              |
|---|--------------|--------------|--------------|
| 6 | -2.905769000 | 3.516814000  | 2.654326000  |
| 6 | 0.734151000  | 4.020122000  | 2.095822000  |
| 1 | -1.431505000 | 4.670430000  | 3.682150000  |
| 1 | -3.732097000 | 3.840251000  | 3.274718000  |
| 6 | 1.636236000  | 3.594388000  | 1.165484000  |
| 6 | 1.220121000  | 2.678823000  | 0.164112000  |
| 1 | 2.657809000  | 3.945042000  | 1.166496000  |
| 6 | 2.198644000  | 2.265709000  | -0.883021000 |
| 6 | 2.633159000  | 0.912046000  | -0.988100000 |
| 6 | 3.553774000  | 0.598103000  | -2.022008000 |
| 6 | 3.516814000  | 2.905769000  | -2.654326000 |
| 6 | 2.678823000  | -1.220121000 | -0.164112000 |
| 6 | 4.020122000  | -0.734151000 | -2.095822000 |
| 6 | 3.975637000  | 1.636236000  | -2.878149000 |
| 1 | 3.840251000  | 3.732097000  | -3.274718000 |
| 6 | 3.594388000  | -1.636236000 | -1.165484000 |
| 1 | 4.719557000  | -1.015373000 | -2.872472000 |
| 1 | 4.670430000  | 1.431505000  | -3.682150000 |
| 1 | 3.945042000  | -2.657809000 | -1.166496000 |
| 6 | 2.265709000  | -2.198644000 | 0.883021000  |
| 6 | 0.912046000  | -2.633159000 | 0.988100000  |
| 6 | 0.598103000  | -3.553774000 | 2.022008000  |
| 6 | 2.905769000  | -3.516814000 | 2.654326000  |
| 6 | -1.220121000 | -2.678823000 | 0.164112000  |
| 6 | 1.636236000  | -3.975637000 | 2.878149000  |
| 1 | 3.732097000  | -3.840251000 | 3.274718000  |
| 1 | 1.431505000  | -4.670430000 | 3.682150000  |
| 6 | -2.198644000 | -2.265709000 | -0.883021000 |
| 6 | -2.633159000 | -0.912046000 | -0.988100000 |
| 6 | -3.553774000 | -0.598103000 | -2.022008000 |
| 6 | -3.516814000 | -2.905769000 | -2.654326000 |
| 6 | -2.678823000 | 1.220121000  | -0.164112000 |
| 6 | -4.020122000 | 0.734151000  | -2.095822000 |
| 6 | -3.975637000 | -1.636236000 | -2.878149000 |
| 1 | -3.840251000 | -3.732097000 | -3.274718000 |
| 6 | -3.594388000 | 1.636236000  | -1.165484000 |
| 1 | -4.719557000 | 1.015373000  | -2.872472000 |
| 1 | -4.670430000 | -1.431505000 | -3.682150000 |
| 1 | -3.945042000 | 2.657809000  | -1.166496000 |
| 7 | -0.000670000 | 2.210026000  | 0.079865000  |
| 7 | 2.210026000  | 0.000670000  | -0.079865000 |
| 7 | 0.000670000  | -2.210026000 | 0.079865000  |
| 7 | -2.210026000 | -0.000670000 | -0.079865000 |

|   |              |              |              |
|---|--------------|--------------|--------------|
| 6 | -0.734151000 | -4.020122000 | 2.095822000  |
| 6 | -1.636236000 | -3.594388000 | 1.165484000  |
| 1 | -2.657809000 | -3.945042000 | 1.166496000  |
| 1 | -1.015373000 | -4.719557000 | 2.872472000  |
| 1 | 1.015373000  | 4.719557000  | 2.872472000  |
| 7 | -3.222072000 | 2.649813000  | 1.663312000  |
| 7 | -2.649813000 | -3.222072000 | -1.663312000 |
| 7 | 3.222072000  | -2.649813000 | 1.663312000  |
| 7 | 2.649813000  | 3.222072000  | -1.663312000 |

Pd[TEN]

E(RB3LYP) = -1795.39237637

|   |              |              |              |
|---|--------------|--------------|--------------|
| 6 | -2.690522000 | 1.345832000  | 1.202564000  |
| 6 | -1.635630000 | 2.261181000  | 0.958752000  |
| 6 | -1.763362000 | 3.549119000  | 1.538314000  |
| 6 | -2.766946000 | 3.759155000  | 2.500186000  |
| 6 | -3.641606000 | 2.737054000  | 2.779989000  |
| 6 | -0.907297000 | 4.572874000  | 1.069414000  |
| 1 | -2.863331000 | 4.722180000  | 2.981523000  |
| 1 | -4.413439000 | 2.839793000  | 3.530239000  |
| 6 | 0.000000000  | 4.287102000  | 0.096750000  |
| 6 | 0.185430000  | 2.945833000  | -0.320660000 |
| 1 | 0.636988000  | 5.043113000  | -0.332183000 |
| 6 | 1.345832000  | 2.690522000  | -1.202564000 |
| 6 | 2.261181000  | 1.635630000  | -0.958752000 |
| 6 | 3.549119000  | 1.763362000  | -1.538314000 |
| 6 | 2.737054000  | 3.641606000  | -2.779989000 |
| 6 | 2.945833000  | -0.185430000 | 0.320660000  |
| 6 | 4.572874000  | 0.907297000  | -1.069414000 |
| 6 | 3.759155000  | 2.766946000  | -2.500186000 |
| 1 | 2.839793000  | 4.413439000  | -3.530239000 |
| 6 | 4.287102000  | 0.000000000  | -0.096750000 |
| 1 | 5.573226000  | 0.998332000  | -1.470201000 |
| 1 | 4.722180000  | 2.863331000  | -2.981523000 |
| 1 | 5.043113000  | -0.636988000 | 0.332183000  |
| 6 | 2.690522000  | -1.345832000 | 1.202564000  |
| 6 | 1.635630000  | -2.261181000 | 0.958752000  |
| 6 | 1.763362000  | -3.549119000 | 1.538314000  |
| 6 | 3.641606000  | -2.737054000 | 2.779989000  |
| 6 | -0.185430000 | -2.945833000 | -0.320660000 |
| 6 | 2.766946000  | -3.759155000 | 2.500186000  |
| 1 | 4.413439000  | -2.839793000 | 3.530239000  |
| 1 | 2.863331000  | -4.722180000 | 2.981523000  |

|    |              |              |              |
|----|--------------|--------------|--------------|
| 6  | -1.345832000 | -2.690522000 | -1.202564000 |
| 6  | -2.261181000 | -1.635630000 | -0.958752000 |
| 6  | -3.549119000 | -1.763362000 | -1.538314000 |
| 6  | -2.737054000 | -3.641606000 | -2.779989000 |
| 6  | -2.945833000 | 0.185430000  | 0.320660000  |
| 6  | -4.572874000 | -0.907297000 | -1.069414000 |
| 6  | -3.759155000 | -2.766946000 | -2.500186000 |
| 1  | -2.839793000 | -4.413439000 | -3.530239000 |
| 6  | -4.287102000 | 0.000000000  | -0.096750000 |
| 1  | -5.573226000 | -0.998332000 | -1.470201000 |
| 1  | -4.722180000 | -2.863331000 | -2.981523000 |
| 1  | -5.043113000 | 0.636988000  | 0.332183000  |
| 7  | -0.586038000 | 1.963638000  | 0.124698000  |
| 7  | 1.963638000  | 0.586038000  | -0.124698000 |
| 7  | 0.586038000  | -1.963638000 | 0.124698000  |
| 7  | -1.963638000 | -0.586038000 | -0.124698000 |
| 6  | 0.907297000  | -4.572874000 | 1.069414000  |
| 6  | 0.000000000  | -4.287102000 | 0.096750000  |
| 1  | -0.636988000 | -5.043113000 | -0.332183000 |
| 1  | 0.998332000  | -5.573226000 | 1.470201000  |
| 1  | -0.998332000 | 5.573226000  | 1.470201000  |
| 7  | -3.643572000 | 1.592806000  | 2.076881000  |
| 7  | -1.592806000 | -3.643572000 | -2.076881000 |
| 7  | 3.643572000  | -1.592806000 | 2.076881000  |
| 7  | 1.592806000  | 3.643572000  | -2.076881000 |
| 46 | 0.000000000  | 0.000000000  | 0.000000000  |

TEN<sup>2+</sup>

E(RB3LYP) = -1667.17128608

|   |              |             |              |
|---|--------------|-------------|--------------|
| 6 | -2.345983000 | 2.264006000 | 0.664678000  |
| 6 | -0.984674000 | 2.652553000 | 0.927094000  |
| 6 | -0.778948000 | 3.669222000 | 1.913867000  |
| 6 | -1.889631000 | 4.182751000 | 2.581011000  |
| 6 | -3.162827000 | 3.772057000 | 2.192304000  |
| 6 | 0.530668000  | 4.193669000 | 2.053810000  |
| 1 | -1.774833000 | 4.958636000 | 3.325765000  |
| 1 | -4.044339000 | 4.209808000 | 2.642411000  |
| 6 | 1.498606000  | 3.772057000 | 1.195216000  |
| 6 | 1.205341000  | 2.726189000 | 0.278370000  |
| 1 | 2.491758000  | 4.192182000 | 1.210947000  |
| 6 | 2.264006000  | 2.345983000 | -0.664678000 |
| 6 | 2.652553000  | 0.984674000 | -0.927094000 |
| 6 | 3.669222000  | 0.778948000 | -1.913867000 |

|   |              |              |              |
|---|--------------|--------------|--------------|
| 6 | 3.772057000  | 3.162827000  | -2.192304000 |
| 6 | 2.726189000  | -1.205341000 | -0.278370000 |
| 6 | 4.193669000  | -0.530668000 | -2.053810000 |
| 6 | 4.182751000  | 1.889631000  | -2.581011000 |
| 1 | 4.209808000  | 4.044339000  | -2.642411000 |
| 6 | 3.772057000  | -1.498606000 | -1.195216000 |
| 1 | 4.949282000  | -0.732208000 | -2.800896000 |
| 1 | 4.958636000  | 1.774833000  | -3.325765000 |
| 1 | 4.192182000  | -2.491758000 | -1.210947000 |
| 6 | 2.345983000  | -2.264006000 | 0.664678000  |
| 6 | 0.984674000  | -2.652553000 | 0.927094000  |
| 6 | 0.778948000  | -3.669222000 | 1.913867000  |
| 6 | 3.162827000  | -3.772057000 | 2.192304000  |
| 6 | -1.205341000 | -2.726189000 | 0.278370000  |
| 6 | 1.889631000  | -4.182751000 | 2.581011000  |
| 1 | 4.044339000  | -4.209808000 | 2.642411000  |
| 1 | 1.774833000  | -4.958636000 | 3.325765000  |
| 6 | -2.264006000 | -2.345983000 | -0.664678000 |
| 6 | -2.652553000 | -0.984674000 | -0.927094000 |
| 6 | -3.669222000 | -0.778948000 | -1.913867000 |
| 6 | -3.772057000 | -3.162827000 | -2.192304000 |
| 6 | -2.726189000 | 1.205341000  | -0.278370000 |
| 6 | -4.193669000 | 0.530668000  | -2.053810000 |
| 6 | -4.182751000 | -1.889631000 | -2.581011000 |
| 1 | -4.209808000 | -4.044339000 | -2.642411000 |
| 6 | -3.772057000 | 1.498606000  | -1.195216000 |
| 1 | -4.949282000 | 0.732208000  | -2.800896000 |
| 1 | -4.958636000 | -1.774833000 | -3.325765000 |
| 1 | -4.192182000 | 2.491758000  | -1.210947000 |
| 7 | -0.002290000 | 2.168516000  | 0.163947000  |
| 7 | 2.168516000  | 0.002290000  | -0.163947000 |
| 7 | 0.002290000  | -2.168516000 | 0.163947000  |
| 7 | -2.168516000 | -0.002290000 | -0.163947000 |
| 6 | -0.530668000 | -4.193669000 | 2.053810000  |
| 6 | -1.498606000 | -3.772057000 | 1.195216000  |
| 1 | -2.491758000 | -4.192182000 | 1.210947000  |
| 1 | -0.732208000 | -4.949282000 | 2.800896000  |
| 1 | 0.732208000  | 4.949282000  | 2.800896000  |
| 7 | -3.376013000 | 2.869606000  | 1.230205000  |
| 7 | -2.869606000 | -3.376013000 | -1.230205000 |
| 7 | 3.376013000  | -2.869606000 | 1.230205000  |
| 7 | 2.869606000  | 3.376013000  | -1.230205000 |

TEPP

E(RB3LYP) = -1731.97752009

|   |              |              |              |
|---|--------------|--------------|--------------|
| 6 | -2.254293000 | 2.208283000  | 0.899139000  |
| 6 | -0.898715000 | 2.644055000  | 0.945763000  |
| 6 | -0.537858000 | 3.554928000  | 1.963188000  |
| 6 | -1.524950000 | 3.988110000  | 2.868854000  |
| 6 | -2.801217000 | 3.516905000  | 2.710363000  |
| 6 | 0.816075000  | 3.968728000  | 1.965898000  |
| 1 | -1.279795000 | 4.683269000  | 3.660909000  |
| 1 | -3.597059000 | 3.830144000  | 3.373781000  |
| 6 | 1.217695000  | 2.689566000  | 0.130541000  |
| 6 | 2.208283000  | 2.254293000  | -0.899139000 |
| 6 | 2.644055000  | 0.898715000  | -0.945763000 |
| 6 | 3.554928000  | 0.537858000  | -1.963188000 |
| 6 | 3.516905000  | 2.801217000  | -2.710363000 |
| 6 | 2.689566000  | -1.217695000 | -0.130541000 |
| 6 | 3.968728000  | -0.816075000 | -1.965898000 |
| 6 | 3.988110000  | 1.524950000  | -2.868854000 |
| 1 | 3.830144000  | 3.597059000  | -3.373781000 |
| 1 | 4.659406000  | -1.171656000 | -2.725088000 |
| 1 | 4.683269000  | 1.279795000  | -3.660909000 |
| 6 | 2.254293000  | -2.208283000 | 0.899139000  |
| 6 | 0.898715000  | -2.644055000 | 0.945763000  |
| 6 | 0.537858000  | -3.554928000 | 1.963188000  |
| 6 | 2.801217000  | -3.516905000 | 2.710363000  |
| 6 | -1.217695000 | -2.689566000 | 0.130541000  |
| 6 | 1.524950000  | -3.988110000 | 2.868854000  |
| 1 | 3.597059000  | -3.830144000 | 3.373781000  |
| 1 | 1.279795000  | -4.683269000 | 3.660909000  |
| 6 | -2.208283000 | -2.254293000 | -0.899139000 |
| 6 | -2.644055000 | -0.898715000 | -0.945763000 |
| 6 | -3.554928000 | -0.537858000 | -1.963188000 |
| 6 | -3.516905000 | -2.801217000 | -2.710363000 |
| 6 | -2.689566000 | 1.217695000  | -0.130541000 |
| 6 | -3.968728000 | 0.816075000  | -1.965898000 |
| 6 | -3.988110000 | -1.524950000 | -2.868854000 |
| 1 | -3.830144000 | -3.597059000 | -3.373781000 |
| 1 | -4.659406000 | 1.171656000  | -2.725088000 |
| 1 | -4.683269000 | -1.279795000 | -3.660909000 |
| 7 | 0.000532000  | 2.221789000  | 0.026507000  |
| 7 | 2.221789000  | -0.000532000 | -0.026507000 |
| 7 | -0.000532000 | -2.221789000 | 0.026507000  |
| 7 | -2.221789000 | 0.000532000  | -0.026507000 |



|   |              |              |              |
|---|--------------|--------------|--------------|
| 6 | -0.816075000 | -3.968728000 | 1.965898000  |
| 1 | -1.171656000 | -4.659406000 | 2.725088000  |
| 1 | 1.171656000  | 4.659406000  | 2.725088000  |
| 7 | 1.678326000  | 3.553770000  | 1.075905000  |
| 7 | 3.553770000  | -1.678326000 | -1.075905000 |
| 7 | -1.678326000 | -3.553770000 | 1.075905000  |
| 7 | -3.553770000 | 1.678326000  | -1.075905000 |
| 7 | -3.161546000 | 2.644055000  | 1.738549000  |
| 7 | -2.644055000 | -3.161546000 | -1.738549000 |
| 7 | 3.161546000  | -2.644055000 | 1.738549000  |
| 7 | 2.644055000  | 3.161546000  | -1.738549000 |

Pd[TEPP]

E(RB3LYP) = -1859.50490340

|   |              |              |              |
|---|--------------|--------------|--------------|
| 6 | -2.243535000 | 2.102835000  | 1.117778000  |
| 6 | -0.959279000 | 2.654404000  | 0.911822000  |
| 6 | -0.714823000 | 3.926645000  | 1.478608000  |
| 6 | -1.645181000 | 4.469323000  | 2.376435000  |
| 6 | -2.793525000 | 3.752539000  | 2.635917000  |
| 6 | 0.463280000  | 4.585649000  | 1.045788000  |
| 1 | -1.468786000 | 5.433027000  | 2.833663000  |
| 1 | -3.525803000 | 4.094291000  | 3.354491000  |
| 6 | 1.040309000  | 2.790773000  | -0.241058000 |
| 6 | 2.102835000  | 2.243535000  | -1.117778000 |
| 6 | 2.654404000  | 0.959279000  | -0.911822000 |
| 6 | 3.926645000  | 0.714823000  | -1.478608000 |
| 6 | 3.752539000  | 2.793525000  | -2.635917000 |
| 6 | 2.790773000  | -1.040309000 | 0.241058000  |
| 6 | 4.585649000  | -0.463280000 | -1.045788000 |
| 6 | 4.469323000  | 1.645181000  | -2.376435000 |
| 1 | 4.094291000  | 3.525803000  | -3.354491000 |
| 1 | 5.570689000  | -0.714212000 | -1.425441000 |
| 1 | 5.433027000  | 1.468786000  | -2.833663000 |
| 6 | 2.243535000  | -2.102835000 | 1.117778000  |
| 6 | 0.959279000  | -2.654404000 | 0.911822000  |
| 6 | 0.714823000  | -3.926645000 | 1.478608000  |
| 6 | 2.793525000  | -3.752539000 | 2.635917000  |
| 6 | -1.040309000 | -2.790773000 | -0.241058000 |
| 6 | 1.645181000  | -4.469323000 | 2.376435000  |
| 1 | 3.525803000  | -4.094291000 | 3.354491000  |
| 1 | 1.468786000  | -5.433027000 | 2.833663000  |
| 6 | -2.102835000 | -2.243535000 | -1.117778000 |
| 6 | -2.654404000 | -0.959279000 | -0.911822000 |

|    |              |              |              |
|----|--------------|--------------|--------------|
| 6  | -3.926645000 | -0.714823000 | -1.478608000 |
| 6  | -3.752539000 | -2.793525000 | -2.635917000 |
| 6  | -2.790773000 | 1.040309000  | 0.241058000  |
| 6  | -4.585649000 | 0.463280000  | -1.045788000 |
| 6  | -4.469323000 | -1.645181000 | -2.376435000 |
| 1  | -4.094291000 | -3.525803000 | -3.354491000 |
| 1  | -5.570689000 | 0.714212000  | -1.425441000 |
| 1  | -5.433027000 | -1.468786000 | -2.833663000 |
| 7  | 0.000000000  | 2.056399000  | 0.130710000  |
| 7  | 2.056399000  | 0.000000000  | -0.130710000 |
| 7  | 0.000000000  | -2.056399000 | 0.130710000  |
| 7  | -2.056399000 | 0.000000000  | -0.130710000 |
| 6  | -0.463280000 | -4.585649000 | 1.045788000  |
| 1  | -0.714212000 | -5.570689000 | 1.425441000  |
| 1  | 0.714212000  | 5.570689000  | 1.425441000  |
| 7  | 1.272030000  | 4.054415000  | 0.171948000  |
| 7  | 4.054415000  | -1.272030000 | -0.171948000 |
| 7  | -1.272030000 | -4.054415000 | 0.171948000  |
| 7  | -4.054415000 | 1.272030000  | -0.171948000 |
| 7  | -3.103873000 | 2.639454000  | 1.955429000  |
| 7  | -2.639454000 | -3.103873000 | -1.955429000 |
| 7  | 3.103873000  | -2.639454000 | 1.955429000  |
| 7  | 2.639454000  | 3.103873000  | -1.955429000 |
| 46 | 0.000000000  | 0.000000000  | 0.000000000  |

TEPP<sup>2+</sup>

E(RB3LYP) = -1731.29011309

|   |              |              |              |
|---|--------------|--------------|--------------|
| 6 | -2.367268000 | 2.349848000  | 0.414597000  |
| 6 | -1.022640000 | 2.703219000  | 0.792285000  |
| 6 | -0.875597000 | 3.747223000  | 1.752695000  |
| 6 | -2.008588000 | 4.367818000  | 2.263175000  |
| 6 | -3.257606000 | 3.991295000  | 1.756983000  |
| 6 | 0.461874000  | 4.126536000  | 2.063350000  |
| 1 | -1.929425000 | 5.166644000  | 2.988583000  |
| 1 | -4.158575000 | 4.495042000  | 2.083145000  |
| 6 | 1.219134000  | 2.703219000  | 0.461750000  |
| 6 | 2.349848000  | 2.367268000  | -0.414597000 |
| 6 | 2.703219000  | 1.022640000  | -0.792285000 |
| 6 | 3.747223000  | 0.875597000  | -1.752695000 |
| 6 | 3.991295000  | 3.257606000  | -1.756983000 |
| 6 | 2.703219000  | -1.219134000 | -0.461750000 |
| 6 | 4.126536000  | -0.461874000 | -2.063350000 |
| 6 | 4.367818000  | 2.008588000  | -2.263175000 |

|   |              |              |              |
|---|--------------|--------------|--------------|
| 1 | 4.495042000  | 4.158575000  | -2.083145000 |
| 1 | 4.847980000  | -0.662508000 | -2.848899000 |
| 1 | 5.166644000  | 1.929425000  | -2.988583000 |
| 6 | 2.367268000  | -2.349848000 | 0.414597000  |
| 6 | 1.022640000  | -2.703219000 | 0.792285000  |
| 6 | 0.875597000  | -3.747223000 | 1.752695000  |
| 6 | 3.257606000  | -3.991295000 | 1.756983000  |
| 6 | -1.219134000 | -2.703219000 | 0.461750000  |
| 6 | 2.008588000  | -4.367818000 | 2.263175000  |
| 1 | 4.158575000  | -4.495042000 | 2.083145000  |
| 1 | 1.929425000  | -5.166644000 | 2.988583000  |
| 6 | -2.349848000 | -2.367268000 | -0.414597000 |
| 6 | -2.703219000 | -1.022640000 | -0.792285000 |
| 6 | -3.747223000 | -0.875597000 | -1.752695000 |
| 6 | -3.991295000 | -3.257606000 | -1.756983000 |
| 6 | -2.703219000 | 1.219134000  | -0.461750000 |
| 6 | -4.126536000 | 0.461874000  | -2.063350000 |
| 6 | -4.367818000 | -2.008588000 | -2.263175000 |
| 1 | -4.495042000 | -4.158575000 | -2.083145000 |
| 1 | -4.847980000 | 0.662508000  | -2.848899000 |
| 1 | -5.166644000 | -1.929425000 | -2.988583000 |
| 7 | 0.032874000  | 2.160946000  | 0.177352000  |
| 7 | 2.160946000  | -0.032874000 | -0.177352000 |
| 7 | -0.032874000 | -2.160946000 | 0.177352000  |
| 7 | -2.160946000 | 0.032874000  | -0.177352000 |
| 6 | -0.461874000 | -4.126536000 | 2.063350000  |
| 1 | -0.662508000 | -4.847980000 | 2.848899000  |
| 1 | 0.662508000  | 4.847980000  | 2.848899000  |
| 7 | 1.475991000  | 3.645215000  | 1.403727000  |
| 7 | 3.645215000  | -1.475991000 | -1.403727000 |
| 7 | -1.475991000 | -3.645215000 | 1.403727000  |
| 7 | -3.645215000 | 1.475991000  | -1.403727000 |
| 7 | -3.415511000 | 3.029989000  | 0.846903000  |
| 7 | -3.029989000 | -3.415511000 | -0.846903000 |
| 7 | 3.415511000  | -3.029989000 | 0.846903000  |
| 7 | 3.029989000  | 3.415511000  | -0.846903000 |
